# Supplementary material for: SWR1-Independent Association of H2A.Z to the LINC Complex Promotes Meiotic Chromosome Motion
Source: Frontiers journal article supplement (doi:10.3389/fcell.2020.594092), 2020-10-22
Supplement: Data_Sheet_1.PDF [file Data_Sheet_1.PDF]

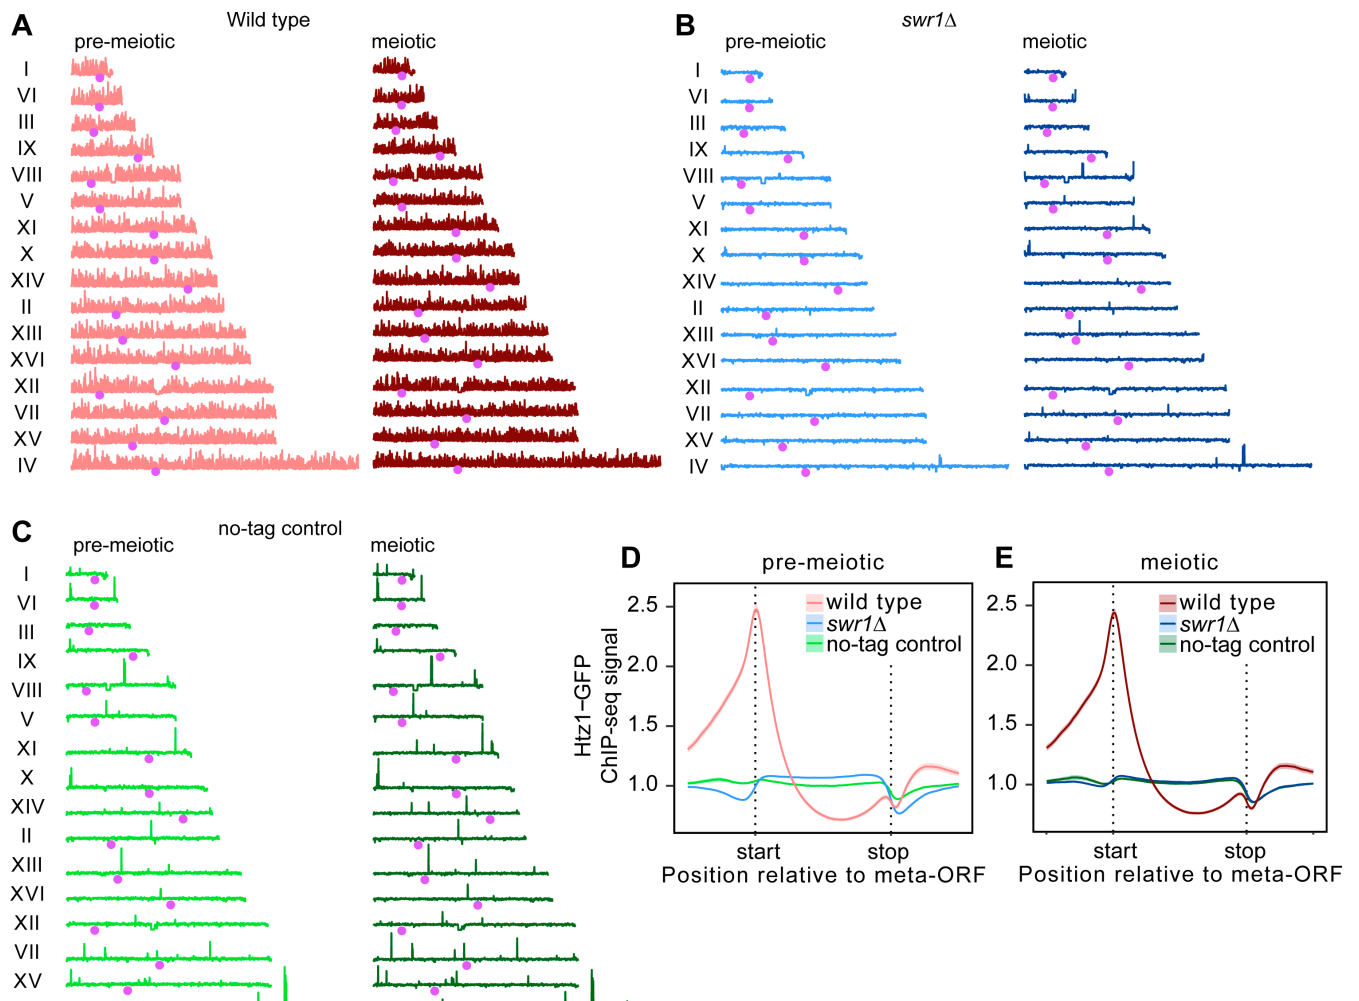

**Supplementary Figure 1. Genome-wide incorporation of H2A.Z to meiotic chromatin depends on SWR1. (Related to Figure 1)**

Profiles of H2A.Z binding to all chromosomes in wild type (**A**), *swr1Δ* (**B**), and the untagged control (**C**), determined by ChIP-seq. Magenta circles indicate the location of the centromere. (**D-E**) Metagenome analysis of H2A.Z binding by ChIP-seq. The ORFs are scaled to the “Start” and “Stop” positions, and up- and downstream flanking regions represent half the size of the ORF. Samples were taken at 0 h and 15 h after meiotic induction. Anti-GFP antibodies were used to immunoprecipitate H2A.Z-GFP. Average profiles from two replicates are shown. Strains are: DP840 (*HTZ1-GFP*), DP841 (*HTZ1-GFP swr1Δ*) and DP421 (*HTZ1* untagged control).

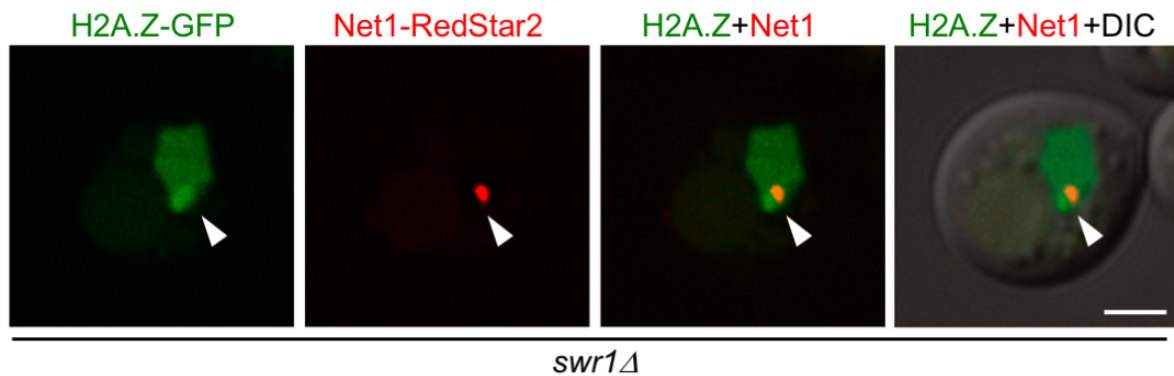

**Supplementary Figure 2. A fraction of H2A.Z accumulates in the vicinity of the nucleolus in *swr1Δ* (Related to Figure 2).**

Microscopy fluorescence images of *swr1Δ* cells expressing *HTZ1-GFP* and *NET1-RedStar2* as a nucleolar marker. A single plane of a representative cell displaying a diffuse peripheral accumulation of H2A.Z is shown. The arrowhead points to the nucleolar area marked by Net1. Images were taken 16 h after meiotic induction. Scale bar, 2  $\mu$ m. The strain is DP1189 (*swr1Δ HTZ1-GFP NET1-RedStar2*).

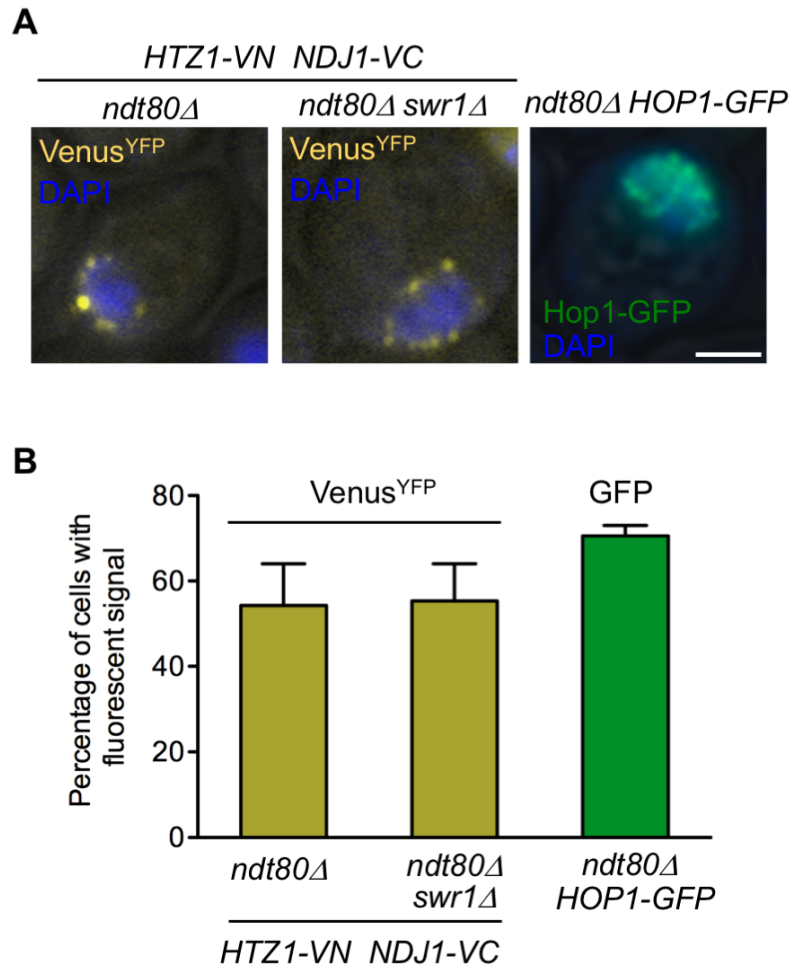

**Supplementary Figure 3. BiFC analysis of H2A.Z-Ndj1 interaction in *ndt80Δ* cells** (Related to Figure 3).

**(A)** Microscopy fluorescence images of *ndt80Δ* and *ndt80Δ swr1Δ* cells expressing *HTZ1* fused to the N-terminal half of the Venus<sup>YFP</sup> (VN) and *NDJ1* fused to the C-terminal half of the Venus<sup>YFP</sup> (VC). Nuclei are stained with DAPI (blue). The reconstitution of Venus<sup>YFP</sup> fluorescence resulting from H2A.Z-VN/Ndj1-VC interaction appears in yellow. A parallel meiotic culture of *ndt80Δ* cells expressing *HOP1-GFP* (green) was used as control for meiotic prophase I staging. Images were taken 24 h after meiotic induction. Representative cells are shown. Scale bar, 2 μm **(B)** Quantification of the percentage of cells displaying Venus<sup>YFP</sup> fluorescent signal or Hop1-GFP signal, as indicated. The analysis was performed in triplicate. More than 300 cells were scored in every experiment. Error bars, SD. Strains are: DP1748 (*ndt80Δ HTZ1-VN NDJ1-VC*), DP1749 (*ndt80Δ swr1Δ HTZ1-VN NDJ1-VC*) and DP963 (*ndt80Δ HOP1-GFP*).

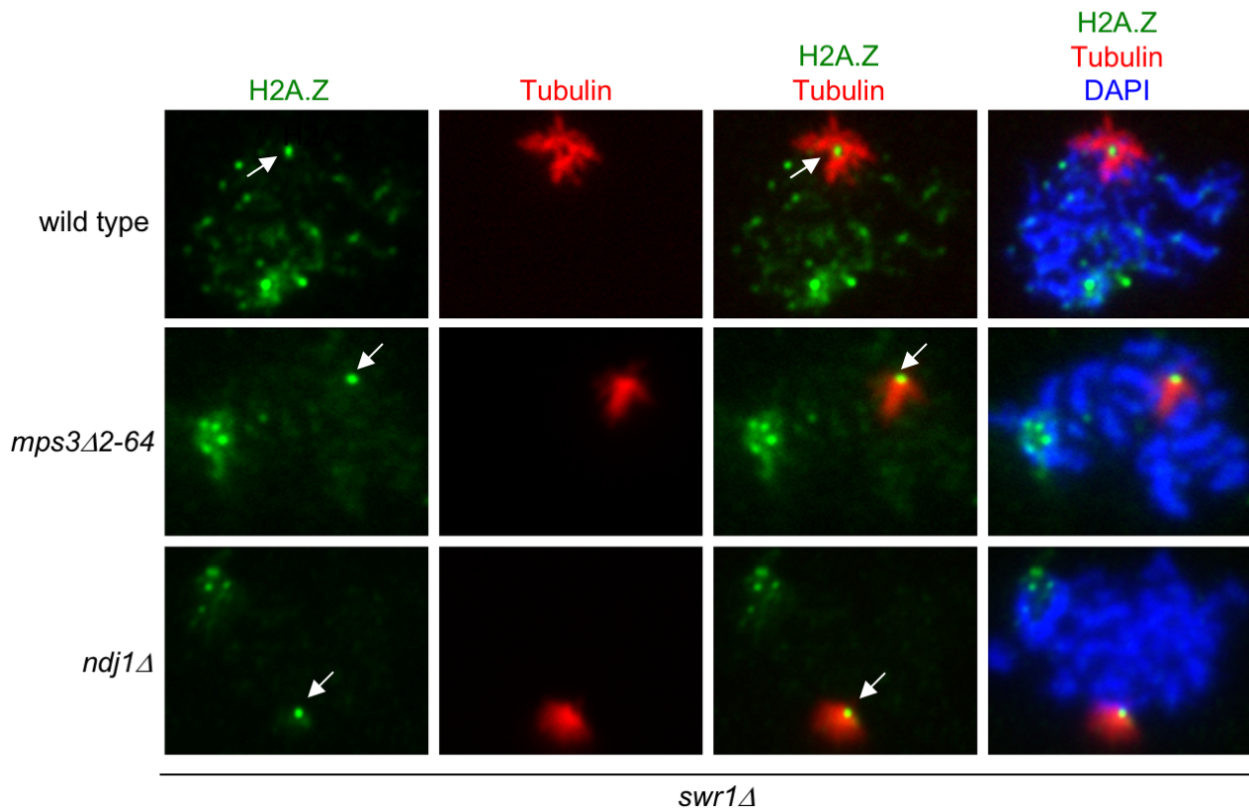

**Supplementary Figure 4. Localization of H2A.Z to the SPB is independent of Ndj1 and the 2-64 N-terminal domain of Mps3. (Related to Figure 5)**

Immunofluorescence of representative spread pachytene nuclei stained with DAPI to visualize chromatin (blue), anti-GFP to detect H2A.Z (green), and anti-tubulin to mark the monopolar prophase spindle (red). The arrow points to an H2A.Z focus present at the center of the bushy spindle corresponding to the SPB location. Strains are DP1395 (wild type), DP1280 (*mps3*-Δ2-64) and DP1305 (*ndj1*Δ). 25, 21 and 23 nuclei were examined for wild type, *mps3*-Δ2-64 and *ndj1*Δ, respectively.

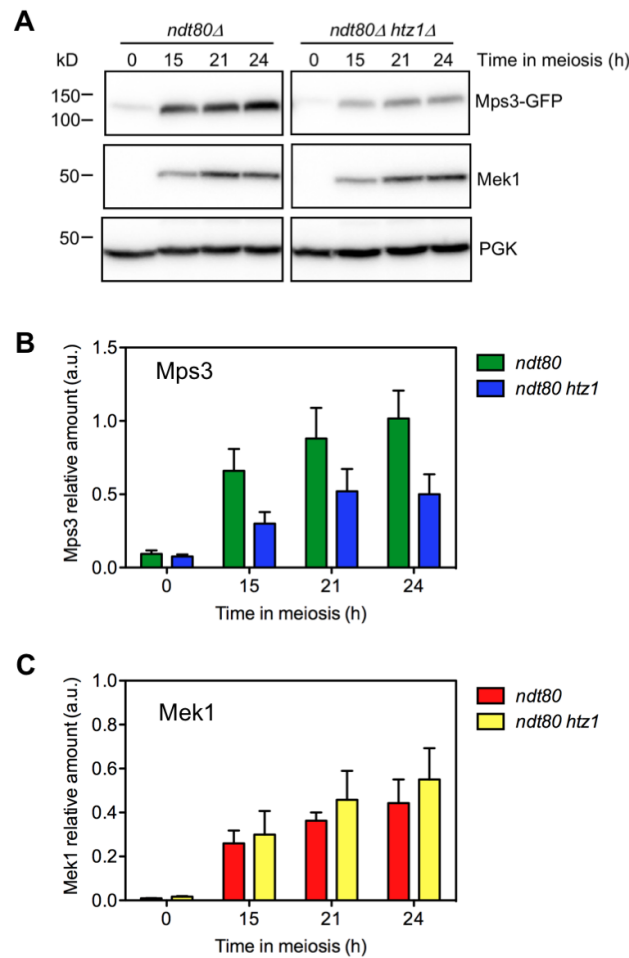

**Supplementary Figure 5. Mps3 global levels are reduced in *ndt80Δ*-arrested cells lacking H2A.Z. (Related to Figure 6)**

(A) Western blot analysis of Mps3-GFP and Mek1 production during meiosis detected with anti-GFP and anti-Mek1 antibodies, respectively. PGK was used as a loading control. A representative blot is shown. (B-C) Quantification of Mps3-GFP (B) and Mek1 (C) levels normalized to PGK. Average and SEM (error bars) from three independent experiments are shown. Strains are: DP1014 (*ndt80Δ MPS3-GFP*) and DP1013 (*ndt80Δ htz1Δ MPS3-GFP*).

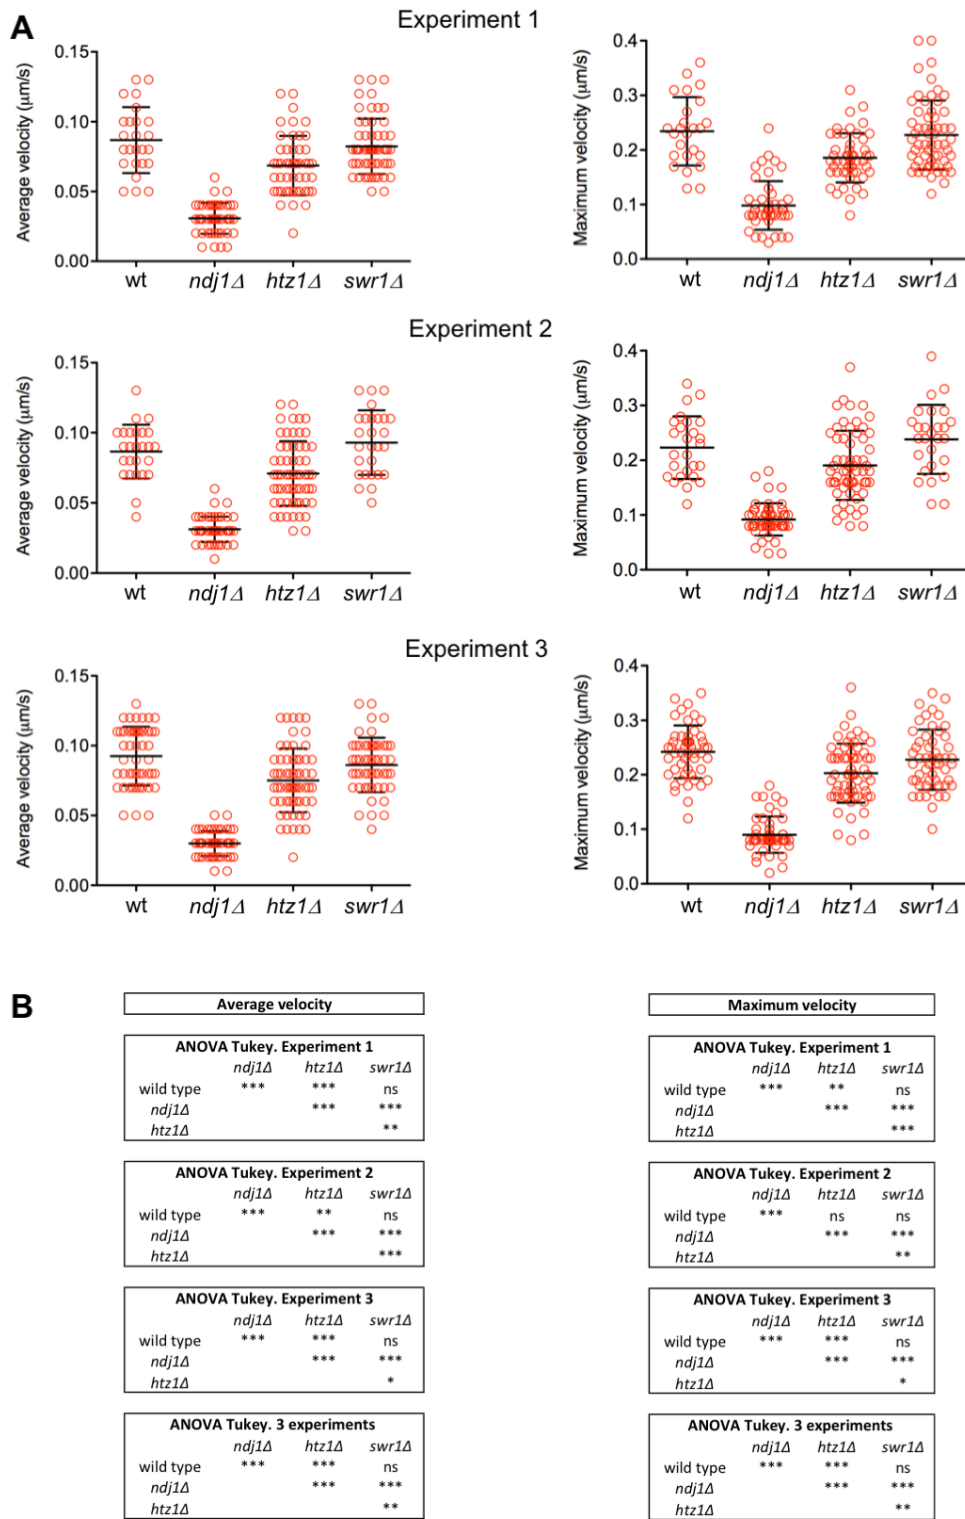

**C**

|                         |                    | wild type     | <i>ndj1Δ</i>  | <i>htz1Δ</i>  | <i>swr1Δ</i>  |
|-------------------------|--------------------|---------------|---------------|---------------|---------------|
| Average velocity (μm/s) | Experiment 1       | 0.086 ± 0.023 | 0.030 ± 0.011 | 0.068 ± 0.021 | 0.082 ± 0.020 |
|                         | Experiment 2       | 0.087 ± 0.019 | 0.03 ± 0.009  | 0.071 ± 0.023 | 0.092 ± 0.023 |
|                         | Experiment 3       | 0.091 ± 0.021 | 0.029 ± 0.008 | 0.074 ± 0.023 | 0.085 ± 0.019 |
|                         | Mean 3 experiments | 0.088 ± 0.003 | 0.030 ± 0.001 | 0.071 ± 0.003 | 0.086 ± 0.005 |
| Maximum velocity (μm/s) | Experiment 1       | 0.234 ± 0.062 | 0.098 ± 0.046 | 0.185 ± 0.046 | 0.227 ± 0.064 |
|                         | Experiment 2       | 0.223 ± 0.057 | 0.091 ± 0.030 | 0.190 ± 0.064 | 0.238 ± 0.063 |
|                         | Experiment 3       | 0.241 ± 0.048 | 0.089 ± 0.033 | 0.202 ± 0.054 | 0.226 ± 0.055 |
|                         | Mean 3 experiments | 0.232 ± 0.009 | 0.093 ± 0.005 | 0.192 ± 0.009 | 0.230 ± 0.007 |

**Supplementary Figure 6. Analysis of *TEL4L* movement.** (Related to Figure 8).

(A) Measurement of average velocity and maximum velocity in three independent time-lapse experiments tracking *TEL4L* movement marked with GFP as depicted in Figure 8. Error bars, SD. (B) ANOVA statistical analysis of the velocity data obtained in every individual experiment as well as combining the data from all three experiments. (C) Mean values for average and maximum velocity. Strains are DP1692 (wild type), DP1722 (*ndj1Δ*), DP1693 (*htz1Δ*) and DP1694 (*swr1Δ*).

**Supplementary Table 1. *Saccharomyces cerevisiae* strains**

| Strain | Genotype                                                                                                         | Source    |
|--------|------------------------------------------------------------------------------------------------------------------|-----------|
| DP421  | <i>MATa/MAT<math>\alpha</math> leu2,3-112 his4-260 thr1-4 ura3-1 trp1-289 ade2-1 lys2<math>\Delta</math>NheI</i> | PSS Lab   |
| DP838  | DP421 <i>htz1::URA3 ZIP1-GFP</i>                                                                                 | This work |
| DP840  | DP421 <i>HTZ1-GFP::kanMX6</i>                                                                                    | PSS Lab   |
| DP841  | DP421 <i>swr1::natMX4 HTZ1-GFP::kanMX6</i>                                                                       | PSS Lab   |
| DP866  | DP421 <i>MPS3-GFP::kanMX6</i>                                                                                    | This work |
| DP867  | DP421 <i>htz1::URA3 MPS3-GFP::kanMX6</i>                                                                         | This work |
| DP957  | DP421 <i>ndj1::natMX4 ZIP1-GFP</i>                                                                               | This work |
| DP963  | DP421 <i>ndt80::LEU2 HOP1-GFP::kanMX6</i>                                                                        | PSS Lab   |
| DP1013 | DP421 <i>ndt80::LEU2 htz1::URA3 MPS3-GFP::kanMX6</i>                                                             | This work |
| DP1014 | DP421 <i>ndt80::LEU2 MPS3-GFP::kanMX6</i>                                                                        | This work |
| DP1032 | DP421 <i>MPS3-GFP::kanMX6 HOP1-mCherry::natMX4</i>                                                               | This work |
| DP1033 | DP421 <i>htz1::URA3 MPS3-GFP::kanMX6 HOP1-mCherry::natMX4</i>                                                    | This work |
| DP1057 | DP421 <i>ZIP1-GFP PMA1-mCherry::natMX4</i>                                                                       | This work |
| DP1091 | DP421 <i>swr1::natMX4 ZIP1-GFP</i>                                                                               | This work |
| DP1102 | DP421 <i>swr1::natMX4 MPS3-GFP::kanMX6</i>                                                                       | This work |
| DP1103 | DP421 <i>ndj1::natMX4 MPS3-GFP::kanMX6</i>                                                                       | This work |
| DP1108 | DP421 <i>swr1::natMX4 HTZ1-GFP::kanMX6 MPS3-mCherry::hphMX4</i>                                                  | This work |
| DP1172 | DP421 <i>HTZ1-GFP::kanMX6 CNM67-mCherry::natMX4 swr1::hphMX4</i>                                                 | This work |
| DP1182 | DP421 <i>HTZ1-GFP::kanMX6 swr1::hphMX4</i>                                                                       | This work |
| DP1189 | DP421 <i>HTZ1-GFP::kanMX6 NET1-RedStar2::natNT2 swr1::hphMX4</i>                                                 | This work |
| DP1280 | DP421 <i>mps3::hphMX4 pSS326 [mps3<math>\Delta</math>2-64-mCherry URA3] HTZ1-GFP::kanMX6 swr1::natMX4</i>        | This work |
| DP1305 | DP421 <i>HTZ1-GFP::kanMX6 swr1::natMX4 ndj1::hphMX4</i>                                                          | This work |
| DP1330 | DP421 <i>MPS3-3HA::kanMX6</i>                                                                                    | This work |

|        |                                                                                                                          |           |
|--------|--------------------------------------------------------------------------------------------------------------------------|-----------|
| DP1394 | DP421 <i>MPS3-3HA::natMX4 HTZI-GFP::kanMX6</i>                                                                           | This work |
| DP1395 | DP421 <i>swr1::hphMX4 MPS3-3HA::natMX4 HTZI-GFP::kanMX6</i>                                                              | This work |
| DP1493 | DP421 <i>swr1::hphMX4 HTZI-VN::TRP1 NDJ1-VC::kanMX6</i>                                                                  | This work |
| DP1496 | DP421 <i>HTZI-VN::TRP1 NDJ1-VC::kanMX6</i>                                                                               | This work |
| DP1506 | DP421 <i>SPC110-RedStar2::natNT2/SPC110 HTZI-VN::TRP1 NDJ1-VC::kanMX6 swr1::hphMX4</i>                                   | This work |
| DP1511 | DP421 <i>mps3::natMX4 pSS269 [MPS3-mCherry URA3] HTZI-VN::TRP1 NDJ1-VC::kanMX6</i>                                       | This work |
| DP1512 | DP421 <i>mps3::natMX4 pSS326 [mps3Δ2-64-mCherry URA3] HTZI-VN::TRP1 NDJ1-VC::kanMX6</i>                                  | This work |
| DP1540 | DP421 <i>HTZI-VN::TRP1</i>                                                                                               | This work |
| DP1541 | DP421 <i>NDJ1-VC::kanMX6</i>                                                                                             | This work |
| DP1576 | DP421 <i>MPS3-GFP::kanMX6 swr1::natMX4 SPC110-mCherry::hphNT1/SPC110</i>                                                 | This work |
| DP1578 | DP421 <i>HTZI-GFP::kanMX6 swr1::natMX4 SPC110-mCherry::hphNT1/SPC110</i>                                                 | This work |
| DP1692 | DP421 <i>P<sub>CUP1</sub>-IME1::kanMX6 ZIP1-mCherry/ZIP1 TEL4L-tetO(50)::URA3/TEL4L TetR-GFP::LEU2/leu2</i>              | This work |
| DP1693 | DP421 <i>htz1::natMX4 P<sub>CUP1</sub>-IME1::kanMX6 ZIP1-mCherry/ZIP1 TEL4L-tetO(50)::URA3/TEL4L TetR-GFP::LEU2/leu2</i> | This work |
| DP1694 | DP421 <i>swr1::hphMX4 P<sub>CUP1</sub>-IME1::kanMX6 ZIP1-mCherry/ZIP1 TEL4L-tetO(50)::URA3/TEL4L TetR-GFP::LEU2/leu2</i> | This work |
| DP1722 | DP421 <i>ndj1::kanMX6 P<sub>CUP1</sub>-IME1::kanMX6 ZIP1-mCherry/ZIP1 TEL4L-tetO(50)::URA3/TEL4L TetR-GFP::LEU2/leu2</i> | This work |
| DP1748 | DP421 <i>ndt80::natMX4 HTZI-VN::TRP1 NDJ1-VC::kanMX6</i>                                                                 | This work |
| DP1749 | DP421 <i>ndt80::natMX4 swr1::hphMX4 HTZI-VN::TRP1 NDJ1-VC::kanMX6</i>                                                    | This work |

\*All strains are diploids isogenic to BR1919 (Rockmill and Roeder, 1990). Unless specified, all strains are homozygous for the indicated markers. DP421 is a *lys2* version of the original BR1919-2N.

Rockmill, B., and G.S. Roeder. 1990. Meiosis in asynaptic yeast. *Genetics*. 126:563-574.



**Supplementary Table 2. Plasmids**

| Plasmid           | Vector  | Relevant parts                                        | Source/Reference                                    |
|-------------------|---------|-------------------------------------------------------|-----------------------------------------------------|
| pSS266            | pJET2.1 | <i>MPS3-mCherry</i>                                   | This work                                           |
| pSS267            | pRS424  | <i>2<math>\mu</math> TRP1 MPS3-mCherry</i>            | This work                                           |
| p SS269           | pRS316  | <i>CEN6 URA3 MPS3-mCherry</i>                         | This work                                           |
| pSS326            | pRS316  | <i>CEN6 URA3 mps3-2-64<math>\Delta</math>-mCherry</i> | This work                                           |
| pSS329<br>(pAC32) | unknown | <i>tetR-NLS-GFP::LEU2</i>                             | Andrés Clemente (IBFG)/<br>(Michaelis et al., 1997) |
| pSS330<br>(pAC18) | pRS406  | <i>TEL4L-tetO(50)::URA3</i>                           | Andrés Clemente (IBFG)                              |
| pFN21             | pFA6a   | <i>mCherry::natMX4</i>                                | César Roncero (IBFG)                                |

Michaelis, C., R. Ciosk, and K. Nasmyth. 1997. Cohesins: chromosomal proteins that prevent premature separation of sister chromatids. *Cell*. 91:35-45.

**Supplementary Table 3. Primary and secondary antibodies**

| <b>Antibody</b>    | <b>Host and type</b> | <b>Application*<br/>(Dilution)</b> | <b>Source / Reference</b> |
|--------------------|----------------------|------------------------------------|---------------------------|
| H2A (acidic patch) | Rabbit polyclonal    | WB (1:5000)                        | Merck 07-146              |
| H2A.Z              | Rabbit polyclonal    | WB (1:1000)                        | Active Motif 39647        |
| H2B                | Rabbit polyclonal    | WB (1:5000)                        | Abcam ab1790              |
| H3                 | Rabbit polyclonal    | WB (1:5000)                        | Abcam ab1791              |
| H4                 | Rabbit polyclonal    | WB (1:1000)                        | Abcam ab10158             |
| Zip1               | Rabbit polyclonal    | IF (1:300)                         | S. Roeder                 |
| HA (12CA5)         | Mouse monoclonal     | WB (1:1000)                        | Roche 11666606001         |
| HA (3F10)          | Rat monoclonal       | IF (1:225)                         | Roche 11867431001         |
| GFP (JL-8)         | Mouse monoclonal     | WB (1:1000-1:2000)<br>IF (1:200)   | Clontech 632381           |
| GFP                | Rabbit polyclonal    | ChIP-seq (3µl)                     | R. Freire                 |
| mCherry/DsRed      | Rabbit polyclonal    | IF (1:200)                         | Clontech 632496           |
| Pgk1 (22C5D8)      | Mouse monoclonal     | WB (1:5000)                        | Invitrogen 459250         |
| Mek1               | Rabbit polyclonal    | WB (1:1000)                        | Ontoso et al., 2013       |
| Tubulin            | Rabbit monoclonal    | IF (1:500)                         | Abcam EPR13798            |
| Anti-mouse-HRP     | Sheep polyclonal     | WB (1:5000)                        | GE-Healthcare NA931       |
| Anti-rabbit-HRP    | Donkey polyclonal    | WB (1:5000)                        | GE-Healthcare NA934       |
| Anti-mouse AF488   | Goat polyclonal      | IF (1:200)                         | Invitrogen A11029         |
| Anti-rabbit AF594  | Goat polyclonal      | IF (1:200)                         | Invitrogen A11012         |
| Anti-rat AF568     | Goat polyclonal      | IF (1:200)                         | Invitrogen A11077         |

\*WB, western blot; IF, immunofluorescence; ChIP-seq, chromatin immunoprecipitation-sequencing

Ontoso, D., I. Acosta, F. van Leeuwen, R. Freire, and P.A. San-Segundo. 2013. Dot1-dependent histone H3K79 methylation promotes activation of the Mek1 meiotic checkpoint effector kinase by regulating the Hop1 adaptor. *PLoS Genet.* 9:e1003262.
