# Supplementary material for: SWR1-Independent Association of H2A.Z to the LINC Complex Promotes Meiotic Chromosome Motion
Source: Front Cell Dev Biol. 2020 Oct 22;8:594092. doi: 10.3389/fcell.2020.594092 (PMC7642583; doi:10.3389/fcell.2020.594092)
Supplement: Supplementary file 5 [file Table_1.XLSX]

## Sheet: Figure 1C
	Figure 1C. Total H2A.Z signal on spreads (a.u.)
	wild type	swr1∆
	2349953	81519
	1588547	85483
	1056138	133467
	1192245	119963
	813336	115360
	1101835	58637
	1373166	54658
	2094773	79386
	1309036	67914
	1705093	85291
	1208188	102124
	2049146	129504
	1739106	107987
	724563	106595
	714164	60039
	1932488	75557
	1992794	74676
	1074167	112918
	1891320	115272
	1368294	95729
	1803095	73451
	1258033	95706
	1446402	104924
	1315189	107293
	1470980	109701
	1704317	86791
	1693134
N	27	26

## Sheet: Figure 3D
	Figure 3D. Percentage of cells with Venus YFP signal
		HTZ1-VN NDJ1-VC	HTZ1-VN NDJ1-VC swr1∆	HTZ1-VN	NDJ1-VC	NDJ1-VC HTZ1-VN MPS3-mCherry	NDJ1-VC HTZ1-VN mps3∆2-64-mCherry
		29.81	22.11	0	0	33.33	0
		20.2	31.09	0	0	28.57	0
		32.65	25	0	0	25.53	0
		24.32	31.72			26.67
		13.83	23.26			37.84
			30.95			26.92
						44.44
						25
						37.5
	Mean	24.162	27.355	0	0	31.7556	0
	N	506	625	300	300	232	345

## Sheet: Figure 5E
	Figure 5E. Line scan fluorescence intensity
	Plane 7 of Z-stack
			Intensity (a.u.)				Intensity (a.u.)
		Pixel position (µm)	H2A.Z	Spc110		Pixel position (µm)	Mps3	Spc110
		0	474.17	19.43		0	86.969	64.293
		0.02	426.7	45.33		0.02	110.626	73.451
		0.04	503.36	123.02		0.04	222.317	125.692
		0.06	453.67	165.9		0.06	367.381	267.829
		0.08	546.02	132.79		0.08	877.328	548.595
		0.1	813.27	98.72		0.1	2008.06	1115.33
		0.12	1172.21	283.64		0.12	4352.88	1771.81
		0.14	1554.34	1017.16		0.14	6219.53	2539.14
		0.16	2063.86	2161.69		0.16	7352.33	3382.76
		0.18	2747.3	2716.58		0.18	7426.71	3471.72
		0.2	3454.07	2055.8		0.2	7418.84	2436.38
		0.22	4037.49	884.19		0.22	7481.93	1061.78
		0.24	4156.12	306.99		0.24	6842.81	366.95
		0.26	3721.26	622.22		0.26	4725.67	529.454
		0.28	2955.12	1498.99		0.28	2828.4	1218.91
		0.3	2079.97	1903.37		0.3	2325.07	1669.2
		0.32	1420.15	1415.76		0.32	2375.93	1465.23
		0.34	1124.72	672.41		0.34	2189.85	940.954
		0.36	973.31	170.55		0.36	1524.53	541.142
		0.38	879.33	62.7		0.38	919.304	339.471
		0.4	803.27	91.3		0.4	610.171	238.67
		0.42	746.74	119.23		0.42	435.815	179.284
		0.44	536.25	87.95		0.44	233.689	94.965
		0.46	525.36	56.73		0.46	193.797	76.92
				Intensity values plotted in the Figure 5E graphs are divided by 1000

## Sheet: Figure 6C
	Figure 6C. Line scan fluorescence intensity of Mps3-GFP
	wild type			htz1∆
	Distance (µm)	Mps3 intensity (a.u.)		Distance (µm)	Mps3 intensity (a.u.)
	0	41		0	91
	0.0663	56		0.0663	82.0625
	0.1326	84		0.1326	94.3016
	0.1989	145		0.1989	107.725
	0.2652	216		0.2652	107.651
	0.3315	220		0.3315	112.785
	0.3978	248.962		0.3978	124.861
	0.4641	225.237		0.4641	145.559
	0.5304	169.707		0.5304	177.536
	0.5967	133.184		0.5967	198.925
	0.663	137.878		0.663	196.505
	0.7293	141.733		0.7293	222.922
	0.7956	139.136		0.7956	270.51
	0.8619	127.57		0.8619	295.112
	0.9282	125.177		0.9282	372.002
	0.9945	137.188		0.9945	454.497
	1.0608	143.901		1.0608	539.54
	1.1271	141.563		1.1271	622.374
	1.1934	131.39		1.1934	675.327
	1.2597	138.191		1.2597	819.049
	1.326	157.967		1.326	926.741
	1.3923	132.022		1.3923	891.654
	1.4586	104.845		1.4586	766.128
	1.5249	87.9284		1.5249	711.951
	1.5912	66.3024		1.5912	624.503
	1.6575	57.4651		1.6575	499.237
	1.7238	67.5989		1.7238	452.379
	1.7901	83.0805		1.7901	415.041
	1.8564	86.5433		1.8564	316.675
	1.9227	132.163		1.9227	312.414
	1.989	192.3		1.989	351.842
	2.0553	237.1		2.0553	366.858
	2.1216	248.08		2.1216	380.917
	2.1879	231.18		2.1879	410.574
	2.2542	194.94		2.2542	404.409
	2.3205	153.78		2.3205	425.395
	2.3868	149.66		2.3868	474.427
	2.4531	190.54		2.4531	515.247
	2.5194	208.06		2.5194	494.767
	2.5857	191.016		2.5857	441.413
	2.652	171.83		2.652	347.841
	2.7183	131.665		2.7183	261.546
	2.7846	103.515		2.7846	208.17
	2.8509	84.4991		2.8509	173.617
	2.9172	82.4781		2.9172	166.278
	2.9835	99.7286		2.9835	168.109
	3.0498	111.096		3.0498	139.472
	3.1161	121.453		3.1161	113.244
	3.1824	111.148		3.1824	116.301
	3.2487	130.23		3.2487	100.625
	3.315	173.03		3.315	80.0335
	3.3813	215.852		3.3813	62.2287
	3.4476	261.818		3.4476	50.1058
	3.5139	244.486		3.5139	62.5144
	3.5802	192.988		3.5802	75.3191
	3.6465	144.781		3.6465	69.0239
	3.7128	122.044		3.7128	56.3186
	3.7791	101.242		3.7791	53.3973
	3.8454	122.528		3.8454	48.6088
	3.9117	156.572		3.9117	47.7794
	3.978	168.175		3.978	55.818
	4.0443	168.402		4.0443	46.3013
	4.1106	224.352		4.1106	44.9614
	4.1769	322.255		4.1769	53.4571
	4.2432	397.832		4.2432	64.9608
	4.3095	493.412		4.3095	75.993
	4.3758	571.443		4.3758	75.0104
	4.4421	549.802		4.4421	70.1333
	4.5084	464.67		4.5084	59.2263
	4.5747	391.45		4.5747	69.477
	4.641	316.914		4.641	88.266
	4.7073	256.136		4.7073	102.404
	4.7736	240.995		4.7736	106.075
	4.8399	250.595		4.8399	89.6706
	4.9062	286.19		4.9062	107.97
	4.9725	265.899		4.9725	142.844
	5.0388	293.563		5.0388	157.576
	5.1051	282.164		5.1051	169.167
	5.1714	258.044		5.1714	164.611
	5.2377	272.576		5.2377	155.366
	5.304	305.902		5.304	116.653
	5.3703	359.629		5.3703	88.7122
	5.4366	336.901		5.4366	67.5395
	5.5029	334.28		5.5029	55.9569
	5.5692	363.509		5.5692	56.0679
	5.6355	385.027		5.6355	63.6209
	5.7018	333.663		5.7018	59.0207
	5.7681	280.03		5.7681	68.4903
	5.8344	289.223		5.8344	56.5967
	5.9007	276.331		5.9007	63.2821
	5.967	235.498		5.967	89.793
	6.0333	216.409		6.0333	108.95
	6.0996	192.803		6.0996	90.2093
	6.1659	157.963		6.1659	71.8909
	6.2322	130.288		6.2322	60.0822
	6.2985	122.246		6.2985	76.3939
	6.3648	108.056		6.3648	106.076
	6.4311	79.4073		6.4311	135.774
	6.4974	47.5126		6.4974	118.65
	6.5637	38.8378		6.5637	116.184
	6.63	75.2616		6.63	108.047
	6.6963	135.741		6.6963	100.91
	6.7626	190.101		6.7626	86.6477
	6.8289	250.003		6.8289	74.3188
	6.8952	301.681		6.8952	65.5425
	6.9615	261.14		6.9615	61.6817
	7.0278	232.709		7.0278	65.6723
	7.0941	203.514		7.0941	59.4273
	7.1604	149.158		7.1604	61.64
	7.2267	138.731		7.2267	72.94
	7.293	164.085		7.293	75.58
	7.3593	214.997		7.3593	80.68
	7.4256	310.799		7.4256	70.93
	7.4919	407.488		7.4919	66.71
	7.5582	339.111		7.5582	62.03
	7.6245	220.619		7.6245	53.61
	7.6908	121.311		7.6908	63.78
	7.7571	64.4705		7.7571	68.29
	7.8234	42.3914		7.8234	63.6157
	7.8897	51.1264		7.8897	68.8465
	7.956	52.0627		7.956	73.2329
				8.0223	72.013
				8.0886	79.9453
				8.1549	81.1001
				8.2212	77.163
				8.2875	78.9216
				8.3538	80.4434
				8.4201	79.9479
				8.4864	75.6961
				8.5527	51.239
				8.619	47.5484
				8.6853	58.3123
				8.7516	74.2025
				8.8179	81.2644
				8.8842	80.9624

## Sheet: Figure 6D
	Figure 6D. Distribution of Mps3
		% Uniform			% Irregular
		Replica 1	Replica 2	Replica 3	Replica 1	Replica 2	Replica 3
	wild type	60.2	64.63	60.35	39.8	35.37	39.65
	htz1∆	41.38	38.13	36.64	58.62	61.87	63.36
	Number of analyzed cells
		Replica 1	Replica 2	Replica 3	Total
	wild type	103	164	116	383
	htz1∆	87	139	161	387

## Sheet: Figure 7C
	Figure 7C. Velocity of chromosome movement (Zip1-GFP)
	wild type (Pma1-mCherry)	ndj1∆	htz1∆	swr1∆
	0.160347	0.0929796	0.155571	0.147898
	0.172306	0.0838571	0.115102	0.181265
	0.191796	0.092102	0.116	0.156857
	0.15249	0.105204	0.115878	0.198122
	0.163918	0.110837	0.173326	0.128388
	0.172857	0.0941837	0.110796	0.128347
	0.127592	0.102163	0.130878	0.119184
	0.218816	0.0872041	0.177551	0.151061
	0.128612	0.121102	0.130571	0.154245
	0.154306	0.0923673	0.0997551	0.164612
	0.152939	0.103347	0.124857	0.116694
	0.119061	0.117408	0.139775	0.100123
	0.204878	0.105571	0.0792245	0.159082
	0.122122	0.0892857	0.13749	0.182633
	0.136694	0.0995714	0.0902653	0.120327
	0.142143	0.099449	0.146469	0.136674
	0.106551		0.153286	0.150694
	0.136388		0.130347	0.140551
	0.0985306			0.134898
	0.158265			0.186959
	0.199102			0.185959
	0.202674			0.152531
	0.136347			0.205
	0.16549			0.123775
	0.123122			0.155714
				0.165163
				0.138082
				0.177122
				0.142796
				0.173286
				0.141694
				0.165306
				0.149959
Average velocity (µm/s)	0.153894	0.0997895	0.129286	0.152576
N	25	16	18	33

## Sheet: Supp. Figure 3
	Supplementary Figure 3. BIFC analysis of Htz1-VN/Ndj1-VC and Hop1-GFP in ndt80
	Replica 1						Replica 1						Replica 1
	ndt80∆	BIFC+	BIFC-	Total	% BIFC+		ndt80∆ swr1∆	BIFC+	BIFC-	Total	% BIFC+		ndt80∆ HOP1-GFP	HOP1-GFP+	HOP1-GFP-	Total	%HOP1-GFP+
		35	73	108	32.4074			46	56	102	45.098			69	32	101	68.3168
		58	47	105	55.2381			48	52	100	48			72	35	107	67.2897
		52	51	103	50.4854			46	61	107	42.9907			82	20	102	80.3922
	Sum	145	171	316	45.8861		Sum	140	169	309	45.3074		Sum	223	87	310	71.9355
	Replica 2						Replica 2						Replica 2
	ndt80∆	BIFC+	BIFC-	Total	% BIFC+		ndt80∆ swr1∆	BIFC+	BIFC-	Total	% BIFC+		ndt80∆ HOP1-GFP	HOP1-GFP+	HOP1-GFP-	Total	%HOP1-GFP+
		34	30	64	53.125			76	41	117	64.9573			71	34	105	67.619
		44	26	70	62.8571			62	40	102	60.7843			69	31	100	69
		52	19	71	73.2394			59	42	101	58.4158			67	34	101	66.3366
		50	22	72	69.4444		Sum	197	123	320	61.5625		Sum	207	99	306	67.6471
	Sum	180	97	277	64.9819
	Replica 3						Replica 3						Replica 3
	ndt80∆	BIFC+	BIFC-	Total	% BIFC+		ndt80∆ swr1∆	BIFC+	BIFC-	Total	% BIFC+		ndt80∆ HOP1-GFP	HOP1-GFP+	HOP1-GFP-	Total	%HOP1-GFP+
		50	57	107	46.729			60	46	106	56.6038			76	26	102	74.5098
		59	46	105	56.1905			61	40	101	60.396			65	29	94	69.1489
		58	52	110	52.7273			60	40	100	60			73	28	101	72.2772
	Sum	167	155	322	51.8634		Sum	181	126	307	58.9577		Sum	214	83	297	72.0539

## Sheet: Supp. Figure 5
	Supplementary Figure 5. Mps3 and Mek1 global levels in ndt80
			Mps3-GFP			PGK			Mps3 levels normalizated to PGK			Mps3 levels normalizated to PGK
			Replica 1	Replica 2	Replica 3	Replica 1	Replica 2	Replica 3	Replica 1	Replica 2	Replica 3	Mean
		Time (h)	Intensity	Intensity	Intensity	Intensity	Intensity	Intensity	Intensity	Intensity	Intensity	Intensity
	ndt80∆	0	3011653	4698032	2483136	33333826	34796424	46422726	0.0903483	0.135015	0.0534897	0.0929509
		15	14255552	31190541	20996602	26101547	32666837	43526679	0.546157	0.954808	0.482385	0.661117
		21	16346697	41008541	35064874	28450623	32037586	44662456	0.574564	1.28001	0.785109	0.879895
		24	19046268	40291046	37640427	28046757	30158596	36287748	0.67909	1.33597	1.03728	1.01745
	ndt80∆ htz1∆	0	1516227	2569386	2197056	27612556	25209544	31797797	0.0549108	0.101921	0.0690946	0.0753088
		15	5744036	10384232	9552574	40102174	26405782	26159543	0.143235	0.393256	0.365166	0.300552
		21	8511498	14337626	15381052	38953662	20207246	24300724	0.218503	0.709529	0.632946	0.520326
		24	7732436	13889895	14363293	33600687	20944353	23560944	0.230127	0.663181	0.609623	0.500977
			Mek1			PGK			Mek1 levels normalizated to PGK			Mek1 levels normalizated to PGK
			Replica 1	Replica 2	Replica 3	Replica 1	Replica 2	Replica 3	Replica 1	Replica 2	Replica 3	Mean
		Time (h)	Intensity	Intensity	Intensity	Intensity	Intensity	Intensity	Intensity	Intensity	Intensity	Intensity
	ndt80∆	0	265903	396506	445023	33333826	34796424	46422726	0.00797697	0.011395	0.00958632	0.00965277
		15	4254088	8194663	15861228	26101547	32666837	43526679	0.162982	0.250856	0.364402	0.259413
		21	8174814	13063469	17534647	28450623	32037586	44662456	0.287333	0.407754	0.392604	0.362564
		24	7217200	13262873	22910224	28046757	30158596	36287748	0.257327	0.439771	0.631349	0.442816
	ndt80∆ htz1∆	0	419699	560337	481119	27612556	25209544	31797797	0.0151996	0.0222272	0.0151306	0.0175191
		15	4717679	7722706	12811888	40102174	26405782	26159543	0.117641	0.292463	0.48976	0.299955
		21	8255122	10108767	16092741	38953662	20207246	24300724	0.211922	0.500255	0.662233	0.458136
		24	9274830	13045811	17737485	33600687	20944353	23560944	0.276031	0.62288	0.752834	0.550582

## Sheet: Supp.Figure 6_Average Velocity
	Supplementary Figure 6 . Analysis of Tel4L movement (Average velocity)
	Experiment 1						Experiment 2						Experiment 3
	Average velocity (mm/s)						Average velocity (mm/s)						Average velocity (mm/s)
	wild type	ndj1∆	htz1∆	swr1∆			wild type	ndj1∆	htz1∆	swr1∆			wild type	ndj1∆	htz1∆	swr1∆
	0.096	0.026	0.073	0.078			0.108	0.033	0.046	0.112			0.13	0.034	0.09	0.105
	0.125	0.019	0.048	0.084			0.052	0.036	0.041	0.088			0.05	0.043	0.079	0.09
	0.097	0.042	0.051	0.072			0.068	0.029	0.084	0.068			0.069	0.032	0.074	0.1
	0.11	0.02	0.017	0.072			0.108	0.029	0.113	0.065			0.046	0.021	0.096	0.127
	0.082	0.012	0.051	0.076			0.065	0.033	0.12	0.089			0.084	0.018	0.085	0.097
	0.095	0.034	0.062	0.093			0.079	0.056	0.112	0.069			0.117	0.024	0.118	0.082
	0.05	0.054	0.069	0.077			0.088	0.04	0.049	0.102			0.065	0.03	0.095	0.102
	0.117	0.026	0.084	0.06			0.074	0.03	0.05	0.106			0.096	0.048	0.044	0.096
	0.122	0.02	0.071	0.058			0.084	0.029	0.026	0.053			0.084	0.032	0.036	0.08
	0.072	0.035	0.055	0.081			0.097	0.019	0.074	0.093			0.07	0.032	0.065	0.07
	0.082	0.027	0.069	0.087			0.098	0.038	0.062	0.105			0.123	0.042	0.087	0.087
	0.097	0.031	0.079	0.125			0.103	0.044	0.068	0.11			0.117	0.025	0.107	0.054
	0.068	0.03	0.051	0.077			0.074	0.015	0.072	0.13			0.076	0.034	0.086	0.081
	0.087	0.035	0.066	0.06			0.099	0.034	0.064	0.114			0.112	0.013	0.053	0.1
	0.092	0.014	0.052	0.131			0.104	0.031	0.06	0.126			0.083	0.031	0.072	0.079
	0.082	0.032	0.044	0.111			0.09	0.023	0.068	0.061			0.112	0.036	0.082	0.077
	0.094	0.039	0.047	0.102			0.089	0.027	0.108	0.115			0.086	0.042	0.041	0.103
	0.082	0.034	0.053	0.067			0.085	0.051	0.044	0.105			0.111	0.024	0.093	0.085
	0.083	0.042	0.062	0.056			0.091	0.026	0.066	0.091			0.096	0.029	0.117	0.102
	0.067	0.044	0.041	0.13			0.133	0.025	0.049	0.058			0.107	0.028	0.088	0.079
	0.047	0.035	0.119	0.098			0.071	0.043	0.08	0.128			0.085	0.025	0.082	0.065
	0.073	0.03	0.065	0.09			0.09	0.042	0.047	0.08			0.112	0.031	0.057	0.065
	0.058	0.014	0.104	0.079			0.076	0.022	0.07	0.098			0.12	0.023	0.044	0.089
	0.126	0.02	0.04	0.063			0.08	0.035	0.074	0.067			0.08	0.009	0.069	0.073
	0.053	0.047	0.062	0.078			0.1	0.03	0.06	0.077			0.109	0.024	0.119	0.039
		0.015	0.108	0.115			0.043	0.035	0.061	0.095			0.116	0.031	0.057	0.115
		0.034	0.075	0.069				0.03	0.048	0.069			0.073	0.019	0.045	0.068
		0.024	0.062	0.068				0.033	0.069				0.103	0.035	0.055	0.085
		0.03	0.083	0.079				0.019	0.061				0.117	0.019	0.123	0.102
		0.026	0.07	0.107				0.035	0.055				0.076	0.03	0.056	0.072
		0.03	0.1	0.075				0.033	0.088				0.105	0.026	0.102	0.055
		0.039	0.089	0.077				0.027	0.094				0.107	0.041	0.055	0.076
		0.06	0.048	0.088				0.034	0.087				0.075	0.036	0.092	0.111
		0.014	0.054	0.117				0.022	0.095				0.114	0.027	0.071	0.093
		0.043	0.066	0.074				0.029	0.06				0.108	0.027	0.101	0.076
		0.026	0.067	0.078				0.027	0.081				0.096	0.036	0.078	0.072
		0.039	0.091	0.078				0.025	0.07				0.099	0.021	0.073	0.096
		0.016	0.072	0.068				0.034	0.043				0.082	0.031	0.06	0.098
		0.03	0.085	0.08				0.017	0.09				0.068	0.019	0.072	0.126
		0.039	0.07	0.11				0.027	0.096				0.077	0.031	0.046	0.12
		0.021	0.116	0.046				0.03	0.025				0.105	0.026	0.074	0.071
		0.022	0.063	0.061				0.029	0.043				0.075	0.036	0.062	0.081
		0.035	0.047	0.104				0.029	0.099				0.106	0.034	0.053	0.086
		0.028	0.071	0.093				0.024	0.05				0.114	0.017	0.067	0.103
		0.031	0.078	0.08				0.027	0.106				0.067	0.02	0.067	0.092
		0.036	0.045	0.078				0.026	0.05				0.09	0.035	0.079	0.088
			0.085	0.1				0.017	0.062				0.051	0.036	0.121	0.075
			0.1	0.107				0.011	0.119				0.066	0.045	0.086	0.101
			0.061	0.072				0.036	0.074				0.074	0.031	0.022	0.046
				0.057				0.047	0.044				0.068	0.025	0.042	0.054
				0.073					0.091						0.045	0.091
				0.075					0.086						0.075	0.062
				0.048					0.036						0.06	0.076
				0.092					0.104						0.081
				0.076					0.079						0.067
				0.071					0.075						0.083
				0.07					0.062						0.077
				0.062					0.066						0.057
				0.063					0.084						0.068
									0.057						0.105
									0.097						0.079
															0.071
Mean	0.08628	0.0304348	0.0681837	0.0816271			0.0865	0.03046	0.0707213	0.0916296			0.09144	0.02928	0.0742903	0.0852453
SD	0.0226284	0.0106618	0.020949	0.0196424			0.0189278	0.00882069	0.0230471	0.022643			0.0212844	0.00827102	0.022598	0.0191892
N	25	46	49	59			26	50	61	27			50	50	62	53

## Sheet: Supp. Figure6_Maximum Velocity
	Supplementary Figure 6 . Analysis of Tel4L movement (Maximum velocity)
	Experiment 1						Experiment 2						Experiment 3
	Maximum velocity (mm/s)						Maximum velocity (mm/s)						Maximum velocity (mm/s)
	wild type	ndj1∆	htz1∆	swr1∆			wild type	ndj1∆	htz1∆	swr1∆			wild type	ndj1∆	htz1∆	swr1∆
	0.239	0.084	0.182	0.154			0.274	0.077	0.177	0.24			0.246	0.079	0.178	0.182
	0.322	0.046	0.188	0.239			0.157	0.08	0.095	0.205			0.122	0.092	0.228	0.22
	0.227	0.168	0.127	0.266			0.124	0.123	0.183	0.202			0.188	0.084	0.163	0.228
	0.203	0.075	0.078	0.221			0.25	0.105	0.23	0.193			0.203	0.047	0.2	0.289
	0.168	0.03	0.165	0.196			0.172	0.076	0.296	0.256			0.236	0.077	0.241	0.191
	0.251	0.122	0.179	0.236			0.15	0.176	0.267	0.164			0.245	0.076	0.264	0.209
	0.129	0.171	0.162	0.303			0.227	0.081	0.187	0.294			0.176	0.08	0.199	0.305
	0.356	0.08	0.182	0.118			0.16	0.1	0.112	0.333			0.272	0.176	0.226	0.215
	0.311	0.076	0.171	0.249			0.169	0.098	0.078	0.173			0.276	0.071	0.088	0.175
	0.186	0.107	0.109	0.208			0.205	0.058	0.16	0.257			0.258	0.087	0.227	0.191
	0.185	0.094	0.158	0.24			0.337	0.09	0.191	0.387			0.335	0.086	0.18	0.191
	0.344	0.093	0.189	0.296			0.236	0.104	0.197	0.24			0.273	0.075	0.245	0.192
	0.235	0.077	0.125	0.177			0.254	0.035	0.16	0.219			0.175	0.076	0.226	0.226
	0.306	0.151	0.166	0.289			0.308	0.101	0.162	0.27			0.256	0.033	0.134	0.348
	0.244	0.035	0.116	0.363			0.213	0.095	0.159	0.266			0.309	0.093	0.155	0.278
	0.189	0.08	0.166	0.267			0.188	0.086	0.197	0.164			0.298	0.147	0.254	0.176
	0.232	0.108	0.125	0.274			0.242	0.095	0.268	0.293			0.315	0.138	0.155	0.312
	0.235	0.088	0.202	0.161			0.26	0.167	0.11	0.285			0.252	0.112	0.269	0.176
	0.266	0.095	0.191	0.16			0.318	0.15	0.163	0.177			0.209	0.065	0.284	0.224
	0.252	0.134	0.164	0.4			0.279	0.079	0.182	0.115			0.244	0.157	0.198	0.253
	0.134	0.104	0.313	0.228			0.178	0.091	0.184	0.322			0.23	0.078	0.201	0.22
	0.21	0.18	0.191	0.239			0.265	0.124	0.139	0.235			0.306	0.101	0.19	0.155
	0.16	0.039	0.191	0.243			0.17	0.078	0.156	0.254			0.255	0.078	0.087	0.268
	0.285	0.082	0.118	0.208			0.268	0.081	0.181	0.124			0.209	0.021	0.169	0.195
	0.174	0.241	0.234	0.194			0.189	0.078	0.151	0.255			0.274	0.081	0.355	0.098
		0.037	0.195	0.328			0.194	0.116	0.192	0.264			0.349	0.081	0.165	0.262
		0.076	0.16	0.195				0.077	0.157	0.236			0.204	0.038	0.159	0.233
		0.065	0.207	0.166				0.114	0.156				0.24	0.124	0.121	0.237
		0.087	0.216	0.17				0.051	0.159				0.236	0.076	0.285	0.337
		0.065	0.228	0.258				0.097	0.133				0.255	0.133	0.183	0.164
		0.087	0.225	0.163				0.09	0.304				0.21	0.078	0.268	0.183
		0.093	0.229	0.301				0.08	0.24				0.19	0.156	0.125	0.23
		0.182	0.16	0.208				0.1	0.264				0.229	0.155	0.307	0.324
		0.042	0.281	0.288				0.079	0.311				0.256	0.08	0.23	0.264
		0.156	0.175	0.307				0.109	0.202				0.185	0.063	0.256	0.25
		0.082	0.179	0.188				0.082	0.175				0.249	0.115	0.179	0.167
		0.194	0.243	0.189				0.054	0.252				0.258	0.076	0.172	0.24
		0.042	0.235	0.138				0.152	0.095				0.301	0.079	0.163	0.208
		0.09	0.273	0.213				0.069	0.26				0.222	0.076	0.237	0.295
		0.1	0.195	0.23				0.092	0.248				0.234	0.078	0.171	0.292
		0.078	0.187	0.156				0.078	0.077				0.253	0.079	0.157	0.155
		0.083	0.178	0.163				0.082	0.172				0.166	0.1	0.235	0.253
		0.096	0.149	0.4				0.112	0.284				0.248	0.088	0.151	0.229
		0.084	0.161	0.292				0.08	0.144				0.273	0.046	0.269	0.333
		0.085	0.158	0.179				0.084	0.374				0.24	0.054	0.209	0.199
		0.106	0.191	0.213				0.083	0.122				0.328	0.1	0.195	0.219
			0.23	0.348				0.033	0.203				0.153	0.09	0.254	0.225
			0.249	0.259				0.026	0.303				0.18	0.117	0.234	0.276
			0.146	0.168				0.096	0.161				0.227	0.08	0.08	0.135
				0.176				0.105	0.105				0.197	0.071	0.186	0.157
				0.185					0.24						0.226	0.265
				0.165					0.215						0.19	0.191
				0.155					0.086						0.163	0.161
				0.226					0.256						0.206
				0.241					0.142						0.153
				0.188					0.168						0.159
				0.173					0.151						0.225
				0.217					0.201						0.155
				0.197					0.252						0.231
									0.188						0.258
									0.238						0.195
															0.23
Mean	0.23372	0.0976087	0.184531	0.226644			0.222577	0.09138	0.19041	0.237889			0.2409	0.08886	0.201581	0.226434
SD	0.0622432	0.045635	0.0458435	0.063658			0.0565064	0.029533	0.0638922	0.0626899			0.0481224	0.0325269	0.0537891	0.0554144
N	25	46	49	59			26	50	61	27			50	50	62	53

[truncated: 3 more sheets: Supp.Fig6_Exp1_RawData, Supp.Fig6_Exp2_RawData, Supp.Fig6_Exp3_RawData]
